# Supplementary material
Source: publisher figshare collection journal article supplement (https://geolsoc.figshare.com/ndownloader/files/5424455)
Supplement: Supplementary file 1 [file 5424455]

Sample	LATITUDE	LONGITUDE	Gold grains (Total)	Normalized gold grains	Normalized chalcopyrite	Normalized andradite	Apatite	Epidote	Normalized jarosite
Units	degree decimal	degree decimal	number	number/10kg	number/10kg	number/10kg	%	%	Grains
12PMA083A01	52.571289	-121.643891	0	0	0	0	0.0	5.0	0
12PMA086A01	52.579592	-121.641286	17	24	0	0	0.0	1.0	0
12PMA087A01	52.577354	-121.637652	9	12	0	0	0.5	3.0	0
12PMA088A01	52.575584	-121.634374	9	10	9	2	0.1	5.0	0
12PMA103A01	52.569561	-121.653644	0	0	0	4	0.1	5.0	0
12PMA587A01	52.617357	-121.674216	1	1	0	211	0.0	40.0	0
12TFE101A01	52.632491	-121.688127	4	4	0	225	0.1	2.0	0
12TFE101A02	52.632491	-121.688127	2	3	0	256	0.0	2.0	0
12TFE102A01	52.619309	-121.663602	2	3	0	100	0.0	0.1	0
12TFE103A01	52.613042	-121.694664	2	3	0	107	0.0	1.0	0
12PMA068A01	52.489691	-121.800296	6	7	0	8	0.1	0.1	0
12PMA069A01	52.493682	-121.766509	6	7	0	5	0.0	0.1	0
12PMA070A01	52.492312	-121.732792	4	6	0	14	0.1	0.1	0
12PMA071A01	52.500644	-121.704341	4	5	0	16	0.0	0.1	0
12PMA072A01	52.479967	-121.686627	4	4	0	2	0.0	0.1	0
12PMA073A01	52.597074	-121.742664	3	4	1	4	0.0	0.1	0
12PMA073A02	52.597074	-121.742664	5	7	0	4	0.0	5.0	0
12PMA075A01	52.587617	-121.727151	5	7	1	22	0.0	0.1	0
12PMA076A01	52.580769	-121.710706	1	1	0	1	0.0	0.1	0
12PMA077A01	52.573214	-121.698597	7	8	1	58	0.1	10.0	0
12PMA079A01	52.566539	-121.681841	76	87	1	2299	0.0	30.0	0
12PMA080A01	52.565416	-121.674724	33	55	0	13333	0.0	40.0	0
12PMA081A01	52.566351	-121.661074	14	20	1	0	0.5	0.1	0
12PMA084A01	52.564112	-121.684771	37	47	0	0	0.0	30.0	0
12PMA089A01	52.562829	-121.629012	2	2	5	1	0.0	15.0	0
12PMA091A01	52.549101	-121.612081	2	2	0	4	0.0	30.0	0
12PMA092A01	52.545711	-121.645766	24	38	3	78125	0.0	40.0	0
12PMA092A02	52.545711	-121.645766	7	31	6	7	0.0	80.0	74
12PMA093A01	52.549929	-121.651264	26	38	3	72	0.0	60.0	0
12PMA093A02	52.549929	-121.651264	18	26	0	147	0.0	60.0	0
12PMA094A01	52.589349	-121.720366	38	40	0	85	0.0	5.0	0
12PMA095A01	52.582802	-121.692107	10	21	0	38	0.1	60.0	0
12PMA097A01	52.514849	-121.684147	12	15	0	0	0.1	2.0	0
12PMA098A01	52.521726	-121.664167	13	13	0	15	0.0	5.0	0
12PMA099A01	52.528602	-121.688141	5	6	0	4	0.0	20.0	0
12PMA100A01	52.538786	-121.692626	17	23	0	8	0.0	60.0	0
12PMA101A01	52.546492	-121.690774	7	9	0	247	0.0	80.0	0
12PMA101A02	52.546492	-121.690774	6	8	3	4	0.0	90.0	0
12PMA102A01	52.555422	-121.678784	10	11	1	7	0.0	70.0	0
12PMA564A01	52.420292	-121.858251	2	2	0	14	0.0	5.0	0
12PMA565A01	52.438282	-121.859584	5	6	0	4	0.0	2.0	1
12PMA566A01	52.451229	-121.855536	2	3	0	4	0.0	0.1	0
12PMA567A01	52.503189	-121.806964	2	3	0	0	0.0	2.0	0
12PMA568A01	52.513044	-121.790547	8	10	0	247	0.0	1.0	0
12PMA568A02	52.513044	-121.790547	5	7	0	290	0.0	1.0	0
12PMA569A01	52.515647	-121.761541	2	2	0	0	0.0	1.0	0
12PMA570A01	52.523416	-121.782744	3	4	0	6	0.0	1.0	0
12PMA571A01	52.527824	-121.762216	5	5	1	0	0.0	0.1	0
12PMA572A01	52.529914	-121.792466	4	5	0	5	0.1	0.1	0
12PMA573A01	52.534746	-121.812699	9	11	0	3	0.0	2.0	0
12PMA574A01	52.553882	-121.735326	8	10	0	0	0.0	0.1	0
12PMA575A01	52.549236	-121.758997	7	7	0	0	0.0	0.1	0
12PMA576A01	52.547672	-121.788314	6	8	0	0	0.0	1.0	0
12PMA577A01	52.566774	-121.775164	5	7	0	0	0.0	0.1	0
12PMA578A01	52.568979	-121.720789	1	1	0	14	0.0	5.0	0
12PMA579A01	52.570379	-121.742596	2	3	0	25	0.0	2.0	0
12PMA580A01	52.574546	-121.762289	9	11	0	11	0.1	6.0	0
12PMA581A01	52.580944	-121.787646	0	0	0	5	0.1	1.0	0
12PMA583A01	52.586844	-121.780797	7	10	0	5	0.0	0.1	0
12PMA584A01	52.596321	-121.783749	1	2	0	0	0.0	1.0	0
12PMA585A01	52.610061	-121.712681	1	1	12	8	0.0	0.1	0
12PMA586A01	52.619134	-121.773592	5	8	2	0	0.0	5.0	0
12PMA588A01	52.620519	-121.647276	0	0	0	270	0.0	0.1	0
12TFE078A01	52.585202	-121.559602	2	3	0	0	0.0	1.0	0
12TFE079A01	52.537687	-121.565501	1	1	0	17	0.0	0.0	0
12TFE080A01	52.540566	-121.550784	1	1	0	0	0.0	0.0	0
12TFE085A01	52.518077	-121.539942	0	0	0	0	0.0	0.0	0
12TFE086A01	52.491166	-121.677439	1	1	0	0	0.0	0.1	0
12TFE087A01	52.497349	-121.648407	0	0	0	6	0.0	0.1	0
12TFE088A01	52.507012	-121.612202	3	4	0	0	0.0	1.0	0
12TFE089A01	52.512812	-121.575881	2	2	0	8	0.1	1.0	0
12TFE090A01	52.510746	-121.542022	4	6	1	7	0.1	0.1	0
12TFE097A01	52.634004	-121.732572	7	9	0	135	0.1	0.1	0
12TFE104A01	52.655052	-121.641451	67	105	0	0	0.1	0.1	0
13PMA005A01	52.610417	-121.712821	0	0	0	4	0.1	0.1	0
13PMA005A03	52.610417	-121.712821	3	4	0	0	0.0	0.1	0
13PMA043A01	52.600219	-121.882339	30	30	0	1	0.0	3.0	1
13PMA500A01	52.582317	-121.646349	1	1	0	1	0.0	0.1	0
13PMA501A01	52.578134	-121.653027	33	41	98	0	0.0	0.5	0
13PMA502A01	52.575796	-121.664321	33	35	3	0	0.0	10.0	1
13PMA503A01	52.581014	-121.711557	4	5	3	65	0.1	0.1	19
13PMA503A02	52.581014	-121.711557	6	9	0	34	0.0	0.5	0
13PMA503A03	52.581014	-121.711557	9	10	1	47	0.0	1.0	19
13PMA520A01	52.588426	-121.691884	7	9	0	1	3.0	10.0	1
13PMA519A01	52.594216	-121.695456	8	8	0	7	0.1	0.1	19
13PMA521A01	52.584039	-121.699301	40	40	2	1980	0.5	20.0	0
